# Supplementary material for: Poly ε-Caprolactone Nanoparticles for Sustained Intra-Articular Immune Modulation in Adjuvant-Induced Arthritis Rodent Model
Source: MDPI journal article supplement (doi:10.3390/pharmaceutics14030519), 2022-02-26
Supplement: s1 [file s1]

**Supplementary Table S1.** Simulated Synovial Fluid (pH 7.4).

| Constituent                                                      | Concentration (g/L) |
|------------------------------------------------------------------|---------------------|
| Sodium chloride (NaCl)                                           | 8.0                 |
| Potassium chloride (KCl)                                         | 0.2                 |
| Sodium phosphate dibasic (Na <sub>2</sub> HPO <sub>4</sub> )     | 1.44                |
| Potassium phosphate monobasic (KH <sub>2</sub> PO <sub>4</sub> ) | 0.24                |
| Hyaluronic acid                                                  | 3.0                 |

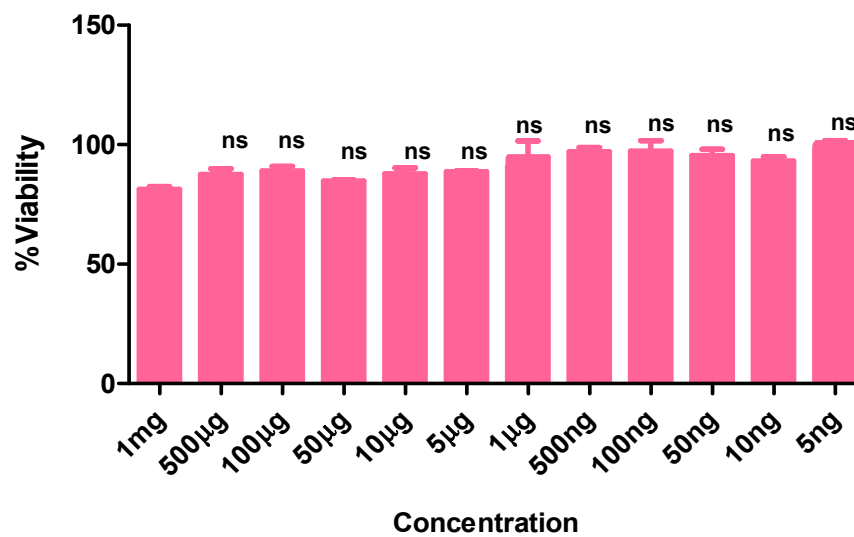

**Supplementary Figure S1.** Cytotoxic effect of Lfd-NPs against L929 murine fibroblast cells upon treatment with different concentration (5 ng–1 mg) of Lfd-NPs for 48 h.
